# Supplementary material
Source: PubMed Central journal article supplement (PMC3986194)
Supplement: 1323426111_sd01.pdf [file 1323426111_sd01.pdf]

**A**

# **Kaplan-Meier Mortality Estimation**

## **Females**

### **WT**

### **KO**

**Kaplan-Meier Estimator:**

| Mean Estimate |           |         |          |
|---------------|-----------|---------|----------|
| Estimate      | Std.Error | 99% LCL | 99% UCL  |
| 751.882       | 38.4897   | 652.74  | 851.0252 |

| Mean Estimate |           |         |         |
|---------------|-----------|---------|---------|
| Estimate      | Std.Error | 99% LCL | 99% UCL |
| 960.132       | 24.55427  | 896.88  | 1023.4  |

**Wilcoxon Test:**

| Mean Estimate |           |         |          | Chi-Square | df | Prob>Chi-Square | Mean Estimate |           |         |         |
|---------------|-----------|---------|----------|------------|----|-----------------|---------------|-----------|---------|---------|
| Estimate      | Std.Error | 99% LCL | 99% UCL  | 33.81409   | 1  | 6.06E-09        | Estimate      | Std.Error | 99% LCL | 99% UCL |
| 774.667       | 32.7135   | 690.402 | 858.9311 |            |    |                 | 974.463       | 20.46637  | 921.74  | 1027.2  |

**Mantel-Haenszel Test:**

| Mean Estimate |           |         |          | Chi-Square | df | Prob>Chi-Square | Mean Estimate |           |         |         |
|---------------|-----------|---------|----------|------------|----|-----------------|---------------|-----------|---------|---------|
| Estimate      | Std.Error | 99% LCL | 99% UCL  | 42.82295   | 1  | 5.99E-11        | Estimate      | Std.Error | 99% LCL | 99% UCL |
| 774.667       | 32.7135   | 690.402 | 858.9311 |            |    |                 | 974.463       | 20.46637  | 921.74  | 1027.2  |

**Taron-Ware Test:**

| Mean Estimate |           |         |          | Chi-Square | df | Prob>Chi-Square | Mean Estimate |           |         |         |
|---------------|-----------|---------|----------|------------|----|-----------------|---------------|-----------|---------|---------|
| Estimate      | Std.Error | 99% LCL | 99% UCL  | 38.18814   | 1  | 6.42E-10        | Estimate      | Std.Error | 99% LCL | 99% UCL |
| 774.667       | 32.7135   | 690.402 | 858.9311 |            |    |                 | 974.463       | 20.46637  | 921.74  | 1027.2  |

B

# Kaplan-Meier Mortality Estimation

## Males

### Kaplan Meir Estimator:

#### WT

| Mean Estimate |           |        |         |
|---------------|-----------|--------|---------|
| 99%           |           |        |         |
| Estimate      | Std.Error | LCL    | 99% UCL |
| 711.941       | 41.1976   | 605.82 | 818.059 |

#### KO

| Mean Estimate |           |         |         |
|---------------|-----------|---------|---------|
| 99%           |           |         |         |
| Estimate      | Std.Error | 99% LCL | 99% UCL |
| 890           | 26.8244   | 820.91  | 959.095 |

### Wilcoxon Test:

| Mean Estimate |           |       |         | Chi-Square | df | Prob>Chi-Square | Mean Estimate |           |         |         |
|---------------|-----------|-------|---------|------------|----|-----------------|---------------|-----------|---------|---------|
| 99%           |           |       |         |            |    |                 |               |           |         |         |
| Estimate      | Std.Error | LCL   | 99% UCL | 16.83822   | 1  | 4.07E-05        | Estimate      | Std.Error | 99% LCL | 99% UCL |
| 733.515       | 36.9248   | 638.4 | 828.627 |            |    |                 | 902.899       | 24.0869   | 840.85  | 964.942 |

### Mantel-Haenszel Test:

| Mean Estimate |           |       |         | Chi-Square | df | Prob>Chi-Square | Mean Estimate |           |         |         |
|---------------|-----------|-------|---------|------------|----|-----------------|---------------|-----------|---------|---------|
| 99%           |           |       |         |            |    |                 |               |           |         |         |
| Estimate      | Std.Error | LCL   | 99% UCL | 23.96175   | 1  | 9.82689E-07     | Estimate      | Std.Error | 99% LCL | 99% UCL |
| 733.515       | 36.9248   | 638.4 | 828.627 |            |    |                 | 902.899       | 24.0869   | 840.85  | 964.942 |

### Taron-Ware Test:

| Mean Estimate |           |       |         | Chi-Square | df | Prob>Chi-Square | Mean Estimate |           |         |         |
|---------------|-----------|-------|---------|------------|----|-----------------|---------------|-----------|---------|---------|
| 99%           |           |       |         |            |    |                 |               |           |         |         |
| Estimate      | Std.Error | LCL   | 99% UCL | 20.07462   | 1  | 7.45E-06        | Estimate      | Std.Error | 99% LCL | 99% UCL |
| 733.515       | 36.9248   | 638.4 | 828.627 |            |    |                 | 902.899       | 24.0869   | 840.85  | 964.942 |

IC

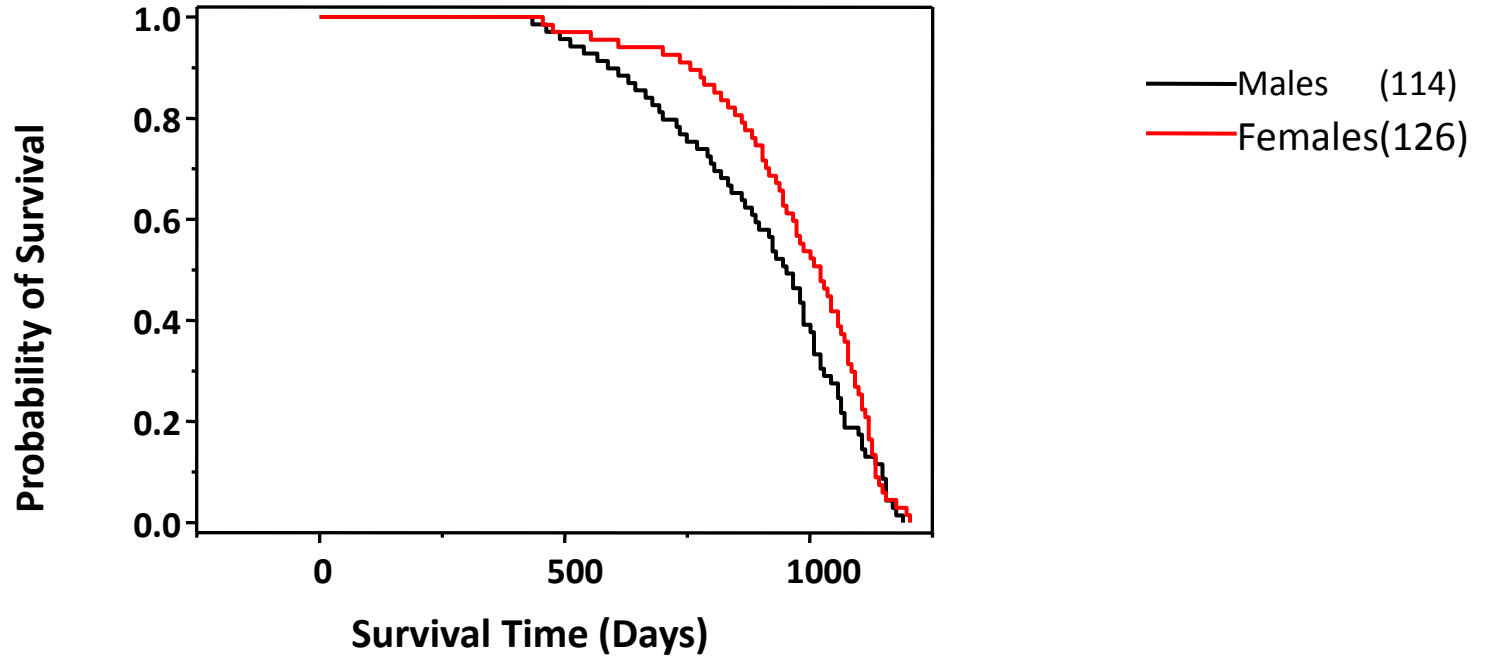

**Wilcoxon (Breslow) Test:**

| <u>Males</u>  |            |          |         | <u>Females</u> |    |                 |               |            |          |          |
|---------------|------------|----------|---------|----------------|----|-----------------|---------------|------------|----------|----------|
| Mean Estimate |            |          |         | Chi-Square     | df | Prob>Chi-Square | Mean Estimate |            |          |          |
| Estimate      | Std. Error | 99% LCL  | 99% UCL | 4.39552        | 1  | 3.60E-02        | Estimate      | Std. Error | 99% LCL  | 99% UCL  |
| 902.8986      | 24.08688   | 855.6891 | 950.108 |                |    |                 | 974.4627      | 20.46637   | 934.3494 | 1014.576 |
